# Supplementary material for: Predicting accumulation and age at onset of amyloid-β from genetic risk and resilience for Alzheimer’s disease
Source: Research Square preprint supplement (doi:10.21203/rs.3.rs-7911284/v1), 2025-10-22
Supplement: Supplementary file 1 [file 65febdf42dd4ebb5694628f4.xlsx]

## Sheet: TableS1
Table S1. (A) Results of linear models testing the association of the optimal risk and resilience polygenic scores (PGSs) with Accumulator status. In each case, models were fit for the full dataset including all participants, as well as for subsets of the data after stratification by the number of APOE ε4 alleles. The P value threshold and resulting number of SNPs in the optimal risk and resilien…
(A)
PGS	Population	Term	β	SE	z value	P	OR	OR 95% CI lower	OR 95% CI upper
Risk P value threshold = 5 x 10-8 NSNPs = 10	All (N = 2175)	(Intercept)	-2.75552	0.557453	-4.94305	7.69087e-07
		PGS	0.15219	0.0514289	2.95922	0.00308415	1.16438	1.05273	1.28787
		SexM	-0.146925	0.103751	-1.41614	0.156736
		StudyAIBL	-1.14384	0.117187	-9.76077	1.65887e-22
		StudyOASIS	-0.454408	0.165619	-2.7437	0.00607515
		Age	0.0524132	0.00722459	7.25484	4.02151e-13
		APOE_ε4_1	1.17793	0.124875	9.43292	3.9882e-21
		APOE_ε4_2	2.74167	0.427147	6.41857	1.37563e-10
		PC1	-5.26699	4.03457	-1.30546	0.191735
		PC2	-2.90738	3.90566	-0.744403	0.456633
		PC3	4.57437	4.13373	1.1066	0.268468
	ε4 non-carriers (N = 1372)	(Intercept)	-2.14153	0.630367	-3.39727	0.000680619
		PGS	0.111439	0.058808	1.89497	0.058097	1.11789	0.996183	1.25446
		SexM	-0.169155	0.117434	-1.44043	0.149747
		StudyAIBL	-1.03942	0.131676	-7.89374	2.93272e-15
		StudyOASIS	-0.279751	0.188009	-1.48796	0.13676
		Age	0.0433828	0.00812686	5.33821	9.38702e-08
		PC1	-6.34749	4.3579	-1.45655	0.145241
		PC2	-0.634444	4.45063	-0.142552	0.886644
		PC3	3.41228	5.0513	0.675524	0.499343
	ε4 heterozygotes (N = 668)	(Intercept)	-3.68485	1.19907	-3.07309	0.00211856
		PGS	0.263153	0.110473	2.38206	0.0172162	1.30103	1.04773	1.61556
		SexM	-0.0893553	0.230804	-0.387148	0.698647
		StudyAIBL	-1.54351	0.27817	-5.5488	2.87638e-08
		StudyOASIS	-0.974775	0.362757	-2.68713	0.00720686
		Age	0.0852504	0.0163215	5.2232	1.75855e-07
		PC1	-1.94825	11.442	-0.170273	0.864796
		PC2	-10.4911	8.25038	-1.27159	0.203517
		PC3	8.20623	7.14601	1.14837	0.250817
	ε4 homozygotes (N = 135)	(Intercept)	18.4776	2080.68	0.00888057	0.992914
		PGS	0.193041	0.387162	0.498605	0.618057	1.21293	0.567907	2.59057
		SexM	-0.195601	0.931854	-0.209905	0.833742
		StudyAIBL	-18.0538	2080.67	-0.00867691	0.993077
		StudyOASIS	-18.0669	2080.67	-0.00868321	0.993072
		Age	0.0417586	0.06773	0.616545	0.537535
		PC1	204.384	173.005	1.18137	0.237454
		PC2	3.90607	30.8986	0.126416	0.899403
		PC3	39.1505	120.365	0.325265	0.74498
Resilience P value threshold = 0.014 NSNPs = 274	All (N = 2175)	(Intercept)	-2.74632	0.556138	-4.93821	7.8843e-07
		PGS	0.0930076	0.0516215	1.80172	0.0715893	1.09747	0.991863	1.21432
		SexM	-0.147411	0.103584	-1.42311	0.154705
		StudyAIBL	-1.14547	0.117128	-9.77967	1.37665e-22
		StudyOASIS	-0.455246	0.165209	-2.75559	0.00585872
		Age	0.0521663	0.00721055	7.23472	4.66498e-13
		APOE_ε4_1	1.19053	0.124678	9.54886	1.31134e-21
		APOE_ε4_2	2.73828	0.426869	6.4148	1.41005e-10
		PC1	-4.9728	4.03687	-1.23185	0.218006
		PC2	-2.46178	3.90403	-0.630575	0.528319
		PC3	5.05536	4.14705	1.21902	0.222835
	ε4 non-carriers (N = 1372)	(Intercept)	-2.13429	0.629512	-3.39039	0.000697932
		PGS	0.0992143	0.0594415	1.66911	0.0950957	1.1043	0.982858	1.24075
		SexM	-0.173141	0.117387	-1.47496	0.140224
		StudyAIBL	-1.0418	0.131749	-7.90744	2.62742e-15
		StudyOASIS	-0.278935	0.187858	-1.48482	0.137592
		Age	0.0432243	0.00811789	5.32457	1.01192e-07
		PC1	-6.072	4.35644	-1.3938	0.163379
		PC2	-0.431872	4.44749	-0.0971047	0.922643
		PC3	3.60307	5.04896	0.713626	0.475459
	ε4 heterozygotes (N = 668)	(Intercept)	-3.66599	1.19342	-3.07183	0.00212748
		PGS	0.0872552	0.111121	0.785227	0.43232	1.09118	0.87762	1.3567
		SexM	-0.0889675	0.229975	-0.386857	0.698862
		StudyAIBL	-1.55558	0.277408	-5.60754	2.05222e-08
		StudyOASIS	-0.999547	0.358981	-2.7844	0.00536274
		Age	0.0850475	0.016278	5.2247	1.74442e-07
		PC1	-1.93238	11.5129	-0.167845	0.866705
		PC2	-9.58826	8.272	-1.15912	0.246406
		PC3	9.13451	7.22826	1.26372	0.20633
	ε4 homozygotes (N = 135)	(Intercept)	17.7663	2031.72	0.00874447	0.993023
		PGS	-0.400872	0.427918	-0.936794	0.348864	0.669736	0.289502	1.54937
		SexM	-0.450313	0.960966	-0.468605	0.639352
		StudyAIBL	-18.1068	2031.72	-0.00891209	0.992889
		StudyOASIS	-18.3037	2031.72	-0.00900898	0.992812
		Age	0.0592764	0.0732827	0.808873	0.418588
		PC1	270.609	201.314	1.34421	0.178879
		PC2	5.94961	30.1229	0.197511	0.843427
		PC3	57.4234	124.917	0.459692	0.645737
(B)
			APOE ε4 alleles
PGS	PGS extreme	Statistic	ε4 non-carriers	ε4 heterozygotes	ε4 homozygotes	Overall
Risk	Low	Proportion	0.602837	0.772358	0.931034	0.672811
		95% CI	0.546 - 0.660	0.698 - 0.846	0.839 - 1.000	0.629 - 0.717
		N	282	123	29	434
	High	Proportion	0.669291	0.874172	0.961538	0.758701
		95% CI	0.611 - 0.727	0.821 - 0.927	0.888 - 1	0.718 - 0.799
		N	254	151	26	431
Resilience	Low	Proportion	0.630189	0.842857	0.96	0.718605
		95% CI	0.572 - 0.688	0.783 - 0.903	0.883 - 1.000	0.676 - 0.761
		N	265	140	25	430
	High	Proportion	0.625	0.838462	0.964286	0.710046
		95% CI	0.568 - 0.682	0.775 - 0.902	0.896 - 1	0.668 - 0.753
		N	280	130	28	438
(C)
PGS	Population	Term	β	SE	z value	P	OR	OR 95% CI lower	OR 95% CI upper
Risk P value threshold = 5 x 10-8 NSNPs = 10	All (N = 865)	(Intercept)	-2.59644	0.888042	-2.92378	0.00345812
		PGS_High	0.488804	0.166099	-2.94286	0.00325197	1.63037	1.17733	2.25772
		SexM	-0.0819351	0.164511	-0.498053	0.618447
		StudyAIBL	-1.22563	0.187877	-6.52354	6.86655e-11
		StudyOASIS	-0.682231	0.258451	-2.63969	0.00829828
		Age	0.0546542	0.0115558	4.7296	2.24963e-06
		APOE_ε4_1	1.02297	0.193706	5.28106	1.28439e-07
		APOE_ε4_2	2.47186	0.612379	4.03648	5.4259e-05
		PC1	-13.595	6.06684	-2.24086	0.025035
		PC2	0.644163	6.70547	0.0960654	0.923469
		PC3	6.76789	6.53034	1.03638	0.300026
	ε4 non-carriers (N = 536)	(Intercept)	-2.08544	1.03293	-2.01895	0.043492
		PGS_High	0.388945	0.191081	-2.0355	0.0418008	1.47542	1.01453	2.1457
		SexM	-0.14986	0.188668	-0.794306	0.427018
		StudyAIBL	-1.07271	0.213485	-5.02473	5.04141e-07
		StudyOASIS	-0.557333	0.298395	-1.86777	0.0617946
		Age	0.0463357	0.0133871	3.46123	0.000537705
		PC1	-13.8949	6.57736	-2.11253	0.0346407
		PC2	1.99332	7.40865	0.269053	0.787889
		PC3	8.10284	7.55613	1.07235	0.283562
	ε4 heterozygotes (N = 274)	(Intercept)	-3.40036	1.77239	-1.91851	0.0550458
		PGS_High	0.742695	0.35069	-2.11781	0.034191	2.10159	1.0569	4.1789
		SexM	0.175477	0.350885	0.500097	0.617007
		StudyAIBL	-1.68788	0.433166	-3.8966	9.7553e-05
		StudyOASIS	-1.07675	0.540218	-1.99318	0.0462414
		Age	0.0840141	0.0241325	3.48137	0.000498857
		PC1	-13.2044	16.7598	-0.787858	0.43078
		PC2	-9.49757	15.9756	-0.594504	0.552175
		PC3	2.79869	15.0551	0.185897	0.852525
	ε4 homozygotes (N = 55)	(Intercept)	23.9236	3069.99	0.00779274	0.993782
		PGS_High	0.647754	1.50586	-0.430155	0.667083	1.91124	0.0998852	36.5705
		SexM	-0.971146	1.53144	-0.634138	0.525991
		StudyAIBL	-18.852	3069.97	-0.00614078	0.9951
		StudyOASIS	0.108083	9328.96	1.15858e-05	0.999991
		Age	-0.024249	0.137364	-0.176531	0.859877
		PC1	79.9795	203.274	0.393456	0.693983
		PC2	74.4486	120.886	0.615857	0.537989
		PC3	-21.9827	187.578	-0.117192	0.906708
Resilience P value threshold = 0.014 NSNPs = 274	All (N = 868)	(Intercept)	-4.28849	0.931701	-4.60286	4.16725e-06
		PGS_High	0.0455299	0.163562	-0.278365	0.780732	1.04658	0.759533	1.44212
		SexM	-0.139459	0.165601	-0.842141	0.399709
		StudyAIBL	-1.00411	0.183565	-5.47006	4.49883e-08
		StudyOASIS	-0.315444	0.263856	-1.19552	0.231885
		Age	0.0713711	0.0121917	5.85408	4.79666e-09
		APOE_ε4_1	1.22777	0.197497	6.21665	5.07891e-10
		APOE_ε4_2	3.06561	0.736627	4.16169	3.15901e-05
		PC1	-2.27821	6.4668	-0.352293	0.724619
		PC2	-6.84003	5.98021	-1.14378	0.252716
		PC3	3.64429	7.88405	0.462236	0.643912
	ε4 non-carriers (N = 545)	(Intercept)	-3.62897	1.05591	-3.43683	0.000588574
		PGS_High	0.0403471	0.185751	-0.21721	0.828045	1.04117	0.723449	1.49843
		SexM	-0.186964	0.187818	-0.995452	0.319516
		StudyAIBL	-0.921743	0.207098	-4.45077	8.55647e-06
		StudyOASIS	-0.111359	0.301322	-0.369568	0.711704
		Age	0.0619486	0.0137771	4.49649	6.90856e-06
		PC1	-3.15156	7.07842	-0.445234	0.65615
		PC2	-2.55499	6.86461	-0.372197	0.709746
		PC3	5.84736	8.83994	0.66147	0.508311
	ε4 heterozygotes (N = 270)	(Intercept)	-5.20822	2.06452	-2.52273	0.0116447
		PGS_High	0.0119921	0.367955	-0.0325911	0.974001	1.01206	0.492038	2.0817
		SexM	0.223727	0.374268	0.597772	0.549992
		StudyAIBL	-1.39803	0.433977	-3.22145	0.00127545
		StudyOASIS	-1.06492	0.576017	-1.84876	0.0644925
		Age	0.103119	0.0282838	3.64588	0.000266478
		PC1	-1.88599	16.2057	-0.116378	0.907353
		PC2	-28.2439	13.0335	-2.16702	0.0302332
		PC3	-15.7667	28.9583	-0.544463	0.586123
	ε4 homozygotes (N = 53)	(Intercept)	936.143	311725	0.00300311	0.997604
		PGS_High	-32.7398	28686.3	0.00114131	0.999089	6.0432e-15	0	Inf
		SexM	-230.73	60847.5	-0.00379195	0.996974
		StudyAIBL	-1573.7	280554	-0.00560926	0.995524
		StudyOASIS	-1368.76	269248	-0.00508365	0.995944
		Age	13.5881	2741.54	0.00495637	0.996045
		PC1	23656.5	5.13186e+06	0.00460974	0.996322
		PC2	15591.4	2.60749e+06	0.00597947	0.995229
		PC3	42593.2	7.39698e+06	0.0057582	0.995406

## Sheet: TableS2
Table S2. (A) Results of linear models testing the association of the optimal risk and resilience polygenic scores (PGSs) with estimated Age at onset of Aβ (AAO-Aβ). In each case, models were fit for the full dataset including all participants, as well as for subsets of the data after stratification by the number of APOE ε4 alleles. The P value threshold and resulting number of SNPs in the optima…
(A)
PGS	Population	Term	β	SE	t value	P
Risk P value threshold = 5.6 x 10-3 NSNPs = 3325	All (N = 1158)	(Intercept)	70.1326	0.576405	121.672	0
		PGS	-1.32412	0.305851	-4.32928	1.62645e-05
		SexM	0.352199	0.578415	0.608903	0.542709
		StudyAIBL	0.65501	0.629989	1.03972	0.29869
		StudyOASIS	2.32996	1.0227	2.27825	0.0228949
		APOE_ε4_1	-6.09543	0.613236	-9.93978	2.17554e-22
		APOE_ε4_2	-12.9797	0.963176	-13.476	1.55688e-38
		PC1	42.4111	25.4951	1.6635	0.0964853
		PC2	9.20869	23.6635	0.389152	0.697236
		PC3	31.2613	24.5714	1.27226	0.203537
	E4 non-carriers (N = 550)	(Intercept)	70.9473	0.762021	93.1041	0
		PGS	-1.29268	0.462851	-2.79287	0.00540892
		SexM	0.257025	0.893386	0.287697	0.773689
		StudyAIBL	-1.16523	0.978585	-1.19073	0.234281
		StudyOASIS	0.645349	1.62229	0.397801	0.690934
		PC1	22.8421	36.6521	0.623215	0.533405
		PC2	2.8623	35.0657	0.0816267	0.934974
		PC3	38.5825	36.2254	1.06507	0.287319
	E4 heterozygotes (N = 480)	(Intercept)	63.3691	0.72235	87.7263	2.34321e-294
		PGS	-1.56152	0.46404	-3.36505	0.000827717
		SexM	0.364693	0.854762	0.42666	0.669821
		StudyAIBL	2.39061	0.940282	2.54244	0.0113264
		StudyOASIS	3.69952	1.44433	2.56141	0.0107344
		PC1	78.039	39.9802	1.95194	0.0515362
		PC2	26.925	37.4395	0.71916	0.472398
		PC3	22.4521	34.6885	0.64725	0.517785
	E4 homozygotes (N = 128)	(Intercept)	55.7251	1.50174	37.1069	1.31277e-67
		PGS	-0.719619	0.876098	-0.821391	0.413052
		SexM	0.919763	1.59773	0.575669	0.565917
		StudyAIBL	2.23213	1.66074	1.34406	0.181465
		StudyOASIS	3.6637	3.03795	1.20598	0.230199
		PC1	-34.6192	92.2972	-0.375084	0.70826
		PC2	2.8295	62.7322	0.0451045	0.964099
		PC3	177.889	154.741	1.14959	0.252599
Resilience P value threshold = 1.75 x 10-3 NSNPs = 34	All (N = 1158)	(Intercept)	70.1117	0.578894	121.113	0
		PGS	0.913526	0.291912	3.12945	0.00179549
		SexM	0.485736	0.580519	0.836729	0.402919
		StudyAIBL	0.655013	0.632564	1.03549	0.300659
		StudyOASIS	3.04139	1.02181	2.97648	0.0029769
		APOE_ε4_1	-6.27242	0.614233	-10.2118	1.71176e-23
		APOE_ε4_2	-13.0677	0.966552	-13.5199	9.30432e-39
		PC1	11.3667	24.7573	0.459124	0.646232
		PC2	10.4062	23.7533	0.438096	0.661399
		PC3	26.2745	24.6339	1.0666	0.286376
	E4 non-carriers (N = 550)	(Intercept)	71.0042	0.766705	92.6095	0
		PGS	0.514501	0.476144	1.08056	0.280375
		SexM	0.261009	0.901853	0.289414	0.772376
		StudyAIBL	-1.24431	0.984584	-1.26379	0.206848
		StudyOASIS	1.47598	1.61512	0.913851	0.361202
		PC1	-4.30839	35.7636	-0.120469	0.904157
		PC2	2.42489	35.2796	0.0687335	0.945227
		PC3	34.1713	36.4324	0.937938	0.348694
	E4 heterozygotes (N = 480)	(Intercept)	63.0932	0.726498	86.8456	2.07817e-292
		PGS	1.19904	0.427473	2.80496	0.00524
		SexM	0.642796	0.863007	0.744834	0.456743
		StudyAIBL	2.32814	0.943387	2.46786	0.013946
		StudyOASIS	4.47314	1.4456	3.09432	0.00208976
		PC1	35.5239	38.0739	0.933024	0.351284
		PC2	25.1677	37.5822	0.669672	0.503394
		PC3	17.1483	34.7388	0.493636	0.621793
	E4 homozygotes (N = 128)	(Intercept)	55.2238	1.49678	36.8951	2.46964e-67
		PGS	1.39674	0.70963	1.96826	0.0513439
		SexM	1.64507	1.59791	1.02951	0.305309
		StudyAIBL	2.4876	1.63936	1.51742	0.131791
		StudyOASIS	3.73785	2.99875	1.24647	0.215019
		PC1	-59.687	91.9346	-0.649234	0.517428
		PC2	8.21474	61.5704	0.13342	0.894084
		PC3	197.773	152.994	1.29269	0.198603
(B)
			APOE ε4 alleles
PGS	PGS extreme	Statistic	ε4 non-carriers	ε4 heterozygotes	ε4 homozygotes	Overall
Risk	Low	Mean	71.3293	66.1598	57.986	67.9359
		SD	9.5313	10.2088	11.2182	10.7729
		N	118	91	24	233
	High	Mean	68.5232	62.3705	58.2798	64.6923
		SD	11.0385	8.76358	10.1208	10.6421
		N	97	91	25	213
Resilience	Low	Mean	70.3578	62.7783	55.7691	65.0888
		SD	9.8077	9.61753	9.63189	10.9151
		N	100	103	31	234
	High	Mean	71.8344	65.0835	58.5109	67.5105
		SD	10.2294	9.18162	8.9301	10.6327
		N	108	96	26	230
(C)
PGS	Population	Term	β	SE	t value	P
Risk P value threshold = 5.6 x 10-3 NSNPs = 3325	All (N = 446)	(Intercept)	67.2135	1.09975	61.1173	6.22603e-216
		PGS_High	-2.89741	1.01588	2.85212	0.00454928
		SexM	0.821226	0.952677	0.862019	0.389151
		StudyAIBL	1.57845	1.0712	1.47353	0.141329
		StudyOASIS	2.74542	1.59574	1.72047	0.0860571
		APOE_ε4_1	-5.61075	1.01259	-5.54097	5.21345e-08
		APOE_ε4_2	-12.0031	1.59067	-7.54595	2.64266e-13
		PC1	16.558	36.6813	0.4514	0.651925
		PC2	-29.0402	44.0499	-0.659257	0.510079
		PC3	45.4023	40.8953	1.11021	0.267522
	E4 non-carriers (N = 215)	(Intercept)	69.3867	1.52858	45.393	1.46987e-109
		PGS_High	-1.98252	1.56215	1.2691	0.205831
		SexM	0.138718	1.42257	0.097512	0.922414
		StudyAIBL	-1.94847	1.57332	-1.23844	0.216955
		StudyOASIS	2.09687	2.47155	0.848403	0.397193
		PC1	-39.8979	56.8831	-0.701401	0.483841
		PC2	-18.2556	65.2934	-0.279593	0.780069
		PC3	30.8035	55.5721	0.554298	0.579973
	E4 heterozygotes (N = 182)	(Intercept)	59.7149	1.31166	45.5261	1.3899e-98
		PGS_High	-4.51275	1.50399	3.00052	0.00309119
		SexM	1.33182	1.41799	0.939227	0.348916
		StudyAIBL	4.54759	1.66505	2.7312	0.00696053
		StudyOASIS	3.02883	2.2481	1.34728	0.179641
		PC1	71.2132	51.7399	1.37637	0.170476
		PC2	-23.6802	68.8965	-0.343707	0.731482
		PC3	39.4169	63.7923	0.617894	0.537453
	E4 homozygotes (N = 49)	(Intercept)	53.594	3.13191	17.1122	2.81705e-20
		PGS_High	0.905695	3.08294	-0.293776	0.770411
		SexM	0.689326	3.03352	0.227236	0.821369
		StudyAIBL	7.61468	3.17161	2.40089	0.0209761
		StudyOASIS	5.15326	5.32678	0.967424	0.339004
		PC1	-39.7279	141.173	-0.281412	0.77981
		PC2	64.406	131.123	0.491189	0.625912
		PC3	387.15	229.113	1.68978	0.098662
Resilience P value threshold = 1.75 x 10-3 NSNPs = 34	All (N = 464)	(Intercept)	71.0982	1.01045	70.363	2.51166e-246
		PGS_High	2.21588	0.906824	-2.44356	0.0149232
		SexM	0.886152	0.90617	0.977909	0.32864
		StudyAIBL	0.646051	0.979321	0.659693	0.509786
		StudyOASIS	3.97098	1.66883	2.3795	0.0177484
		APOE_ε4_1	-7.08874	0.964361	-7.35071	9.25435e-13
		APOE_ε4_2	-13.8614	1.45905	-9.50028	1.21099e-19
		PC1	6.9345	36.572	0.189612	0.849698
		PC2	11.6927	39.4209	0.296612	0.766898
		PC3	10.7491	33.3472	0.32234	0.747343
	E4 non-carriers (N = 208)	(Intercept)	71.5546	1.39813	51.179	7.17371e-117
		PGS_High	1.22248	1.43867	-0.849728	0.396492
		SexM	1.43774	1.43753	1.00015	0.318446
		StudyAIBL	-2.5125	1.59727	-1.57299	0.117301
		StudyOASIS	1.95591	2.3936	0.81714	0.414821
		PC1	-10.4671	53.9824	-0.193899	0.846452
		PC2	-11.8949	63.9725	-0.185937	0.852682
		PC3	9.68416	50.5188	0.191694	0.848176
	E4 heterozygotes (N = 199)	(Intercept)	63.8062	1.33879	47.6595	5.51672e-108
		PGS_High	2.57794	1.34168	-1.92143	0.0561665
		SexM	-0.176493	1.34508	-0.131213	0.895745
		StudyAIBL	2.55292	1.42982	1.78548	0.0757702
		StudyOASIS	5.89095	2.55442	2.30618	0.0221741
		PC1	-18.5607	57.6282	-0.322076	0.747748
		PC2	26.1872	58.8381	0.445073	0.656771
		PC3	9.23675	46.3144	0.199436	0.842134
	E4 homozygotes (N = 57)	(Intercept)	54.285	2.61915	20.7262	6.73222e-26
		PGS_High	3.70305	2.60619	-1.42086	0.161689
		SexM	4.44835	2.64292	1.68312	0.0987135
		StudyAIBL	3.32545	2.54163	1.30839	0.196844
		StudyOASIS	4.94811	6.84377	0.72301	0.473111
		PC1	14.4159	127.003	0.113509	0.910091
		PC2	16.5716	97.5367	0.169901	0.865788
		PC3	205.915	203.079	1.01396	0.315581

## Sheet: Table S3
Table S3. Number of non-accumulators and accumulators (and % accumulators) of Aβ in the discovery and validation sets of each of the 10 cross-validation (CV)runs used to develop PGSs for accumulator status
CV run	Discovery			Validation
	Non-accumulators	Accumulators	% Accumulators	Non-accumulators	Accumulators	% Accumulators
1	413	1037	71.5172	206	519	71.5862
2	409	1041	71.7931	210	515	71.0345
3	427	1023	70.5517	192	533	73.5172
4	403	1047	72.2069	216	509	70.2069
5	412	1038	71.5862	207	518	71.4483
6	422	1028	70.8966	197	528	72.8276
7	422	1028	70.8966	197	528	72.8276
8	413	1037	71.5172	206	519	71.5862
9	417	1033	71.2414	202	523	72.1379
10	406	1044	72	213	512	70.6207
Mean			71.4207			71.7793
SD			0.497509			0.995017

## Sheet: Table S4
Table S4. Genome-wide significant (P < 5 x 10-8) SNPs in GWASs run in discovery sets from the 10 cross-validation (CV) runs for each of Accumulator status and estimated Age at Onset of Aβ (AAO-Aβ)
Trait	CV run	Chromosome	Position (GRCh38)	rsID	Ref allele	Alt allele	OR	P
Accumulator status	9	6	169320808	rs12192157	T	C	1.62	2.07 x 10-8
Accumulator status	9	6	169320811	rs6900289	A	G	1.62	2.07 x 10-8
	CV run	Chromosome	Position (GRCh38)	rsID	Ref allele	Alt allele	Beta	P
AAO-Aβ	5	1	99342068	rs12022131	A	T	4.3	2.24 x 10-9

## Sheet: Table S5
Table S5. Full results of logistic regression models testing risk, resilience and trait-specific PGSs against Accumulator status within each of 10 cross-validation (CV) runs. Also shown are odds ratios (OR) and 95% confidence intervals for the PGS against Accumulator Status in each CV run, and overall mean OR and 95% CI for each PGS. PGSs are standardised to mean = 0, SD = 1 within each sample. N…
PGS	CV run	Threshold	NSNPs	PGS R2	Term	β	SE	z value	P	PFDR	OR	OR 95% CI lower	OR 95% CI upper
Risk	1	5e-08	10	0.000354796	(Intercept)	-3.44796	0.95181	-3.62253	0.000291732
					PGS	0.0363138	0.0889613	0.408198	0.683128	0.766777	1.03698	0.871055	1.23451
					SexM	-0.409976	0.182136	-2.25093	0.0243901
					StudyAIBL	-1.05235	0.201917	-5.21177	1.87042e-07
					StudyOASIS	-0.320693	0.299003	-1.07254	0.283478
					Age	0.0626872	0.0124849	5.02104	5.13922e-07
					APOE_ε4_1	1.11939	0.211031	5.30436	1.13067e-07
					APOE_ε4_2	2.64556	0.744473	3.5536	0.000379996
					PC1	-11.8428	6.78572	-1.74525	0.0809416
					PC2	-1.33216	6.46305	-0.20612	0.836698
					PC3	4.78507	7.60308	0.629359	0.529114
	2	5e-08	10	0.0182769	(Intercept)	-2.37511	0.962603	-2.46739	0.0136103
					PGS	0.259319	0.0882802	2.93745	0.00330925	0.00728034	1.29605	1.09012	1.54087
					SexM	-0.180733	0.17928	-1.0081	0.313404
					StudyAIBL	-0.960349	0.196815	-4.87944	1.06385e-06
					StudyOASIS	-0.135338	0.294913	-0.458907	0.646301
					Age	0.0458238	0.0124111	3.69216	0.000222358
					APOE_ε4_1	1.19427	0.225558	5.29473	1.19194e-07
					APOE_ε4_2	2.68014	0.736231	3.64035	0.000272268
					PC1	-9.05876	6.4151	-1.4121	0.157921
					PC2	-10.2685	6.27822	-1.63558	0.101927
					PC3	-2.37871	7.26657	-0.32735	0.743403
	3	5e-08	10	0.00283958	(Intercept)	-3.49831	0.997983	-3.50538	0.000455952
					PGS	0.104143	0.091844	1.13391	0.256833	0.344531	1.10976	0.926936	1.32864
					SexM	-0.216106	0.188725	-1.14508	0.252174
					StudyAIBL	-1.31725	0.214441	-6.14273	8.11165e-10
					StudyOASIS	-0.653742	0.291514	-2.24257	0.0249245
					Age	0.0654113	0.0129193	5.06308	4.1253e-07
					APOE_ε4_1	1.22374	0.229632	5.32913	9.86817e-08
					APOE_ε4_2	2.89464	0.73984	3.91251	9.13404e-05
					PC1	-7.56598	6.99554	-1.08154	0.279455
					PC2	10.6661	7.99182	1.33462	0.182
					PC3	7.833	7.72637	1.0138	0.310678
	4	5e-08	10	0.0114802	(Intercept)	-2.00772	0.98869	-2.03069	0.0422868
					PGS	0.222962	0.0962118	2.31741	0.0204816	0.0395259	1.24977	1.03498	1.50914
					SexM	-0.34393	0.180416	-1.90632	0.0566087
					StudyAIBL	-1.11043	0.207231	-5.35839	8.39685e-08
					StudyOASIS	-0.421708	0.283635	-1.4868	0.137068
					Age	0.0413474	0.0124784	3.31353	0.000921272
					APOE_ε4_1	1.41499	0.221598	6.38539	1.70956e-10
					APOE_ε4_2	3.06119	0.738945	4.14265	3.43312e-05
					PC1	-1.34742	6.4561	-0.208705	0.834679
					PC2	3.50832	7.42483	0.472511	0.636562
					PC3	6.21672	6.84038	0.908827	0.363441
	5	5e-08	10	0.00371893	(Intercept)	-3.72484	1.00188	-3.71784	0.000200934
					PGS	0.128147	0.0970866	1.31993	0.18686	0.266943	1.13672	0.939749	1.37498
					SexM	-0.159397	0.181167	-0.879835	0.378949
					StudyAIBL	-0.911899	0.203602	-4.47884	7.50498e-06
					StudyOASIS	-0.323985	0.282894	-1.14525	0.252105
					Age	0.0631705	0.0130208	4.85152	1.22522e-06
					APOE_ε4_1	1.28823	0.215079	5.98957	2.10396e-09
					APOE_ε4_2	3.33061	1.03345	3.2228	0.00126943
					PC1	-3.60846	6.68502	-0.539782	0.589347
					PC2	-10.7807	6.82463	-1.57968	0.11418
					PC3	-1.39322	7.33195	-0.19002	0.849293
	6	5e-08	10	0.00675017	(Intercept)	-3.64451	0.963922	-3.78092	0.000156252
					PGS	0.154376	0.0912376	1.69202	0.0906412	0.146625	1.16693	0.975847	1.39543
					SexM	-0.373527	0.182172	-2.05041	0.0403245
					StudyAIBL	-1.01709	0.205165	-4.9574	7.14417e-07
					StudyOASIS	-0.453701	0.284869	-1.59266	0.111236
					Age	0.0659069	0.0125941	5.23316	1.66638e-07
					APOE_ε4_1	1.11552	0.218531	5.10464	3.31421e-07
					APOE_ε4_2	2.66249	0.741774	3.58936	0.000331489
					PC1	1.31648	7.51463	0.175189	0.860931
					PC2	-1.11704	6.75218	-0.165434	0.868603
					PC3	-7.78847	9.96461	-0.781613	0.434442
	7	5e-08	10	0.0135882	(Intercept)	-3.84351	1.00877	-3.81011	0.000138902
					PGS	0.249802	0.0996403	2.50704	0.0121746	0.0252681	1.28377	1.05602	1.56064
					SexM	-0.0438201	0.182659	-0.239901	0.810407
					StudyAIBL	-1.04282	0.201391	-5.17809	2.2417e-07
					StudyOASIS	-0.00561015	0.305307	-0.0183755	0.985339
					Age	0.0660379	0.0131996	5.00302	5.64403e-07
					APOE_ε4_1	1.09717	0.2112	5.19493	2.04797e-07
					APOE_ε4_2	2.44252	0.750688	3.2537	0.00113912
					PC1	9.01904	7.66304	1.17695	0.239214
					PC2	2.6377	7.03195	0.375103	0.707584
					PC3	5.51827	7.7595	0.711164	0.476983
	8	5e-08	10	0.0193294	(Intercept)	-1.84353	0.981822	-1.87766	0.0604275
					PGS	0.252936	0.0850964	2.97235	0.00295534	0.00663444	1.2878	1.08997	1.52154
					SexM	-0.588409	0.186684	-3.1519	0.00162213
					StudyAIBL	-1.39805	0.214817	-6.50807	7.61233e-11
					StudyOASIS	-0.78934	0.285962	-2.7603	0.00577479
					Age	0.0467627	0.0127557	3.66603	0.000246342
					APOE_ε4_1	1.0349	0.218367	4.73926	2.14501e-06
					APOE_ε4_2	2.83672	0.747096	3.79699	0.000146462
					PC1	-22.7383	6.65871	-3.41481	0.000638256
					PC2	-10.4527	6.74532	-1.54962	0.121232
					PC3	3.53333	6.61858	0.53385	0.593445
	9	5e-08	10	0.016599	(Intercept)	-3.08181	0.956109	-3.22328	0.00126733
					PGS	0.255215	0.0925981	2.75615	0.00584853	0.0123719	1.29074	1.07651	1.5476
					SexM	-0.0376796	0.184869	-0.203818	0.838496
					StudyAIBL	-1.07351	0.210113	-5.10921	3.23507e-07
					StudyOASIS	-0.378157	0.281032	-1.3456	0.178431
					Age	0.054984	0.0124269	4.42461	9.66167e-06
					APOE_ε4_1	1.54335	0.232113	6.64913	2.94832e-11
					APOE_ε4_2	2.35711	0.631239	3.7341	0.000188386
					PC1	-8.40927	7.11127	-1.18253	0.236996
					PC2	-11.2894	6.30917	-1.78936	0.0735561
					PC3	2.27807	6.6833	0.34086	0.733209
	10	5e-08	10	0.0132637	(Intercept)	-2.28046	0.945304	-2.4124	0.0158477
					PGS	0.21999	0.0882964	2.4915	0.0127205	0.0259121	1.24606	1.04805	1.48149
					SexM	-0.0511657	0.177709	-0.287919	0.773409
					StudyAIBL	-1.15022	0.20529	-5.60289	2.10807e-08
					StudyOASIS	-0.484222	0.283264	-1.70944	0.0873695
					Age	0.0452284	0.0120832	3.74307	0.000181782
					APOE_ε4_1	1.23883	0.219741	5.63766	1.72375e-08
					APOE_ε4_2	2.58772	0.73983	3.49772	0.000469251
					PC1	-5.21604	6.61732	-0.788241	0.430556
					PC2	13.6067	7.86094	1.73092	0.0834652
					PC3	4.42654	6.82681	0.648406	0.516723
Resilience	1	0.014	274	0.00462589	(Intercept)	-3.37241	0.953466	-3.537	0.0004047
					PGS	0.134184	0.0912961	1.46977	0.141624	0.239671	1.1436	0.95623	1.36769
					SexM	-0.42539	0.182598	-2.32965	0.0198245
					StudyAIBL	-1.052	0.202291	-5.20044	1.98815e-07
					StudyOASIS	-0.336224	0.299002	-1.12449	0.260806
					Age	0.0619323	0.0124974	4.95561	7.21025e-07
					APOE_ε4_1	1.12122	0.210822	5.3183	1.04739e-07
					APOE_ε4_2	2.61829	0.744252	3.51802	0.000434786
					PC1	-11.829	6.80876	-1.73731	0.0823317
					PC2	-1.67375	6.4662	-0.258847	0.795754
					PC3	4.27994	7.63369	0.560664	0.575026
	2	0.014	274	0.00163148	(Intercept)	-2.39695	0.957709	-2.5028	0.0123217
					PGS	0.0682556	0.0774435	0.88136	0.378123	0.485483	1.07064	0.91986	1.24613
					SexM	-0.17155	0.178079	-0.963335	0.335379
					StudyAIBL	-0.961239	0.196164	-4.90017	9.5753e-07
					StudyOASIS	-0.120252	0.292925	-0.410522	0.681423
					Age	0.0458319	0.0123549	3.70962	0.000207568
					APOE_ε4_1	1.21181	0.224143	5.40642	6.42963e-08
					APOE_ε4_2	2.66906	0.736089	3.62601	0.000287839
					PC1	-7.28225	6.38121	-1.1412	0.253786
					PC2	-8.97025	6.23714	-1.4382	0.150378
					PC3	-0.410919	7.17781	-0.0572485	0.954347
	3	0.014	274	0.00248364	(Intercept)	-3.55373	1.00263	-3.54442	0.000393485
					PGS	0.0940658	0.0888449	1.05876	0.289707	0.40339	1.09863	0.923052	1.30761
					SexM	-0.208669	0.188486	-1.10708	0.268259
					StudyAIBL	-1.32487	0.214899	-6.16509	7.04448e-10
					StudyOASIS	-0.658269	0.290834	-2.26339	0.0236118
					Age	0.0661827	0.0130099	5.08709	3.63608e-07
					APOE_ε4_1	1.23911	0.229835	5.39128	6.99562e-08
					APOE_ε4_2	2.9274	0.740688	3.95227	7.74137e-05
					PC1	-7.22764	7.00242	-1.03216	0.301995
					PC2	11.615	7.99286	1.45317	0.146176
					PC3	7.86277	7.83309	1.00379	0.31548
	4	0.014	274	0.00300829	(Intercept)	-2.02987	0.984148	-2.06257	0.0391538
					PGS	0.102987	0.086647	1.18859	0.234603	0.358421	1.10848	0.935344	1.31366
					SexM	-0.323381	0.179736	-1.7992	0.0719871
					StudyAIBL	-1.09984	0.206321	-5.33073	9.78186e-08
					StudyOASIS	-0.395394	0.282142	-1.4014	0.161095
					Age	0.0411896	0.0124272	3.31448	0.000918146
					APOE_ε4_1	1.43752	0.221351	6.4943	8.34187e-11
					APOE_ε4_2	3.05427	0.736932	4.14457	3.40449e-05
					PC1	-1.20827	6.45822	-0.187091	0.85159
					PC2	3.06996	7.41168	0.414205	0.678724
					PC3	7.24707	6.8417	1.05925	0.289486
	5	0.014	274	0.00293091	(Intercept)	-3.74402	1.00245	-3.73488	0.000187806
					PGS	0.105367	0.0899033	1.172	0.241196	0.363446	1.11112	0.931608	1.32522
					SexM	-0.1591	0.181061	-0.878708	0.379559
					StudyAIBL	-0.917832	0.203625	-4.50745	6.56109e-06
					StudyOASIS	-0.309263	0.282607	-1.09432	0.273813
					Age	0.0633974	0.0130315	4.86493	1.14498e-06
					APOE_ε4_1	1.30043	0.215113	6.04536	1.49077e-09
					APOE_ε4_2	3.36383	1.03283	3.25691	0.00112631
					PC1	-2.87257	6.67147	-0.430576	0.666777
					PC2	-10.5982	6.81649	-1.55479	0.119997
					PC3	-1.21243	7.31167	-0.165821	0.868297
	6	0.014	274	0.00362276	(Intercept)	-3.75875	0.967885	-3.88347	0.000102975
					PGS	0.11842	0.0913833	1.29586	0.195025	0.306468	1.12572	0.941114	1.34653
					SexM	-0.357196	0.182271	-1.9597	0.0500311
					StudyAIBL	-1.03229	0.205784	-5.01637	5.26563e-07
					StudyOASIS	-0.446305	0.283251	-1.57565	0.115106
					Age	0.0674399	0.0126677	5.32375	1.01648e-07
					APOE_ε4_1	1.12409	0.217951	5.15754	2.50214e-07
					APOE_ε4_2	2.67645	0.741371	3.61014	0.000306029
					PC1	1.06283	7.53078	0.141132	0.887766
					PC2	-0.369439	6.74862	-0.0547429	0.956343
					PC3	-7.36644	9.89864	-0.744187	0.456763
	7	0.014	274	0.000183527	(Intercept)	-3.69253	1.00081	-3.68954	0.000224661
					PGS	-0.0250349	0.0854269	-0.293056	0.769479	0.854977	0.975276	0.824918	1.15304
					SexM	-0.0718987	0.181732	-0.395631	0.692377
					StudyAIBL	-1.00379	0.201423	-4.98347	6.24531e-07
					StudyOASIS	-0.0203609	0.305135	-0.0667273	0.946799
					Age	0.0640772	0.0130938	4.89371	9.89513e-07
					APOE_ε4_1	1.10656	0.210325	5.26121	1.43111e-07
					APOE_ε4_2	2.46332	0.749575	3.28629	0.00101517
					PC1	9.29509	7.64681	1.21555	0.224156
					PC2	3.26163	7.04126	0.463217	0.643209
					PC3	6.51492	7.62089	0.854877	0.392619
	8	0.014	274	0.0016831	(Intercept)	-1.81223	0.973845	-1.8609	0.0627587
					PGS	0.0730262	0.0828341	0.881596	0.377995	0.485483	1.07576	0.914545	1.26539
					SexM	-0.592868	0.185505	-3.19596	0.00139367
					StudyAIBL	-1.4147	0.214144	-6.60632	3.93984e-11
					StudyOASIS	-0.789159	0.283732	-2.78135	0.00541326
					Age	0.0461232	0.0126625	3.64251	0.000269996
					APOE_ε4_1	1.05329	0.216903	4.85604	1.19759e-06
					APOE_ε4_2	2.79031	0.743664	3.75211	0.000175352
					PC1	-21.6629	6.60475	-3.2799	0.00103844
					PC2	-10.7323	6.71537	-1.59817	0.110006
					PC3	3.57472	6.60317	0.541364	0.588257
	9	0.014	274	9.52474e-05	(Intercept)	-3.09509	0.949837	-3.25855	0.00111985
					PGS	0.0201383	0.095869	0.21006	0.83362	0.898104	1.02034	0.845553	1.23126
					SexM	-0.0369382	0.184069	-0.200676	0.840952
					StudyAIBL	-1.04461	0.208482	-5.01057	5.42701e-07
					StudyOASIS	-0.383547	0.279121	-1.37412	0.169403
					Age	0.0548845	0.01235	4.44409	8.82645e-06
					APOE_ε4_1	1.54179	0.230587	6.68637	2.28776e-11
					APOE_ε4_2	2.27079	0.623132	3.64415	0.000268278
					PC1	-7.22522	7.0822	-1.02019	0.307636
					PC2	-10.6405	6.29049	-1.69151	0.0907385
					PC3	3.86187	6.58479	0.586483	0.557551
	10	0.014	274	4.40583e-05	(Intercept)	-2.25479	0.941593	-2.39465	0.0166361
					PGS	0.0141259	0.0977172	0.144559	0.885059	0.912657	1.01423	0.837445	1.22833
					SexM	-0.0408377	0.177089	-0.230606	0.817621
					StudyAIBL	-1.13679	0.204137	-5.56875	2.56574e-08
					StudyOASIS	-0.505283	0.281429	-1.79542	0.0725871
					Age	0.0447361	0.0120254	3.72013	0.000199122
					APOE_ε4_1	1.24252	0.218884	5.67662	1.37379e-08
					APOE_ε4_2	2.60109	0.740477	3.51272	0.000443548
					PC1	-5.3466	6.62618	-0.806889	0.41973
					PC2	14.3502	7.89054	1.81865	0.0689643
					PC3	5.4152	6.88274	0.78678	0.431411
Accumulator	1	0.00215005	1320	0.00150773	(Intercept)	-3.45636	0.950809	-3.63518	0.000277784
		0.00810005	4380	0.00273707	PGS	0.0811018	0.0964546	0.840829	0.400444	0.478792	1.08448	0.897673	1.31016
		0.00810005	4380	0.00273707	SexM	-0.413621	0.182132	-2.271	0.023147
		0.00810005	4380	0.00273707	StudyAIBL	-1.05083	0.201961	-5.20316	1.95926e-07
		0.00810005	4380	0.00273707	StudyOASIS	-0.331488	0.299327	-1.10744	0.268102
		0.00810005	4380	0.00273707	Age	0.0625909	0.0124619	5.02259	5.09789e-07
		0.00810005	4380	0.00273707	APOE_ε4_1	1.12895	0.210938	5.35204	8.69683e-08
		0.00810005	4380	0.00273707	APOE_ε4_2	2.64731	0.744579	3.55544	0.000377348
		0.00810005	4380	0.00273707	PC1	-11.751	6.78095	-1.73294	0.0831061
		0.00810005	4380	0.00273707	PC2	-1.12717	6.46552	-0.174335	0.861602
		0.00810005	4380	0.00273707	PC3	4.91199	7.58177	0.647869	0.51707
	2	0.00355005	2111	0.00534181	(Intercept)	-2.37511	0.957339	-2.48095	0.0131034
			787	0.00424527	PGS	0.152185	0.0955206	1.59321	0.111113	0.177136	1.16438	0.965571	1.40411
			787	0.00424527	SexM	-0.170427	0.178253	-0.956097	0.339023
			787	0.00424527	StudyAIBL	-0.942426	0.195557	-4.8192	1.44137e-06
			787	0.00424527	StudyOASIS	-0.126147	0.293301	-0.430094	0.667127
			787	0.00424527	Age	0.0454294	0.0123401	3.68145	0.00023191
			787	0.00424527	APOE_ε4_1	1.22808	0.224665	5.46627	4.5961e-08
			787	0.00424527	APOE_ε4_2	2.66175	0.736037	3.61633	0.000298812
			787	0.00424527	PC1	-6.9493	6.37313	-1.09041	0.275534
			787	0.00424527	PC2	-9.14398	6.26116	-1.46043	0.144172
			787	0.00424527	PC3	-0.612519	7.26635	-0.0842952	0.932822
	3	0.00150005	949	0.0101315	(Intercept)	-3.56036	0.999296	-3.56287	0.000366821
		0.2472	67954	0.00754349	PGS	-0.194124	0.0907973	-2.13799	0.0325177	0.063874	0.823556	0.689294	0.983969
		0.00055005	365	0.0155838	SexM	-0.213539	0.189298	-1.12805	0.259297
		0.2472	67954	0.00754349	StudyAIBL	-1.30691	0.214853	-6.08278	1.18114e-09
		0.00055005	365	0.0155838	StudyOASIS	-0.686535	0.291425	-2.35579	0.0184836
		0.2472	67954	0.00754349	Age	0.0662686	0.0129523	5.11637	3.11476e-07
		0.00055005	365	0.0155838	APOE_ε4_1	1.30608	0.234069	5.57988	2.4069e-08
		0.2472	67954	0.00754349	APOE_ε4_2	2.93369	0.740011	3.96438	7.35855e-05
		0.00055005	365	0.0155838	PC1	-8.04562	6.93221	-1.16061	0.245799
		0.2472	67954	0.00754349	PC2	11.184	7.99777	1.39839	0.161996
		0.00055005	365	0.0155838	PC3	9.01453	7.6037	1.18555	0.235802
	4	0.2472	67954	0.00816384	(Intercept)	-1.93217	0.986646	-1.95832	0.050193
		0.00055005	365	0.0155838	PGS	0.173118	0.0884439	1.95738	0.0503029	0.0907102	1.18901	0.999768	1.41406
		0.2472	67954	0.00754349	SexM	-0.332573	0.180136	-1.84623	0.0648583
		0.00055005	365	0.0155838	StudyAIBL	-1.08245	0.20637	-5.2452	1.56112e-07
		0.2472	67954	0.00754349	StudyOASIS	-0.408042	0.282836	-1.44268	0.14911
		0.00055005	365	0.0155838	Age	0.0401796	0.0124449	3.2286	0.00124398
		0.2472	67954	0.00754349	APOE_ε4_1	1.43356	0.221724	6.4655	1.00964e-10
		0.00055005	365	0.0155838	APOE_ε4_2	3.0522	0.737224	4.14013	3.47115e-05
		0.2472	67954	0.00754349	PC1	-3.62495	6.5779	-0.551079	0.581579
		0.00055005	365	0.0155838	PC2	3.15835	7.43842	0.4246	0.671128
		0.2472	67954	0.00754349	PC3	6.92778	6.90484	1.00332	0.315705
	5	0.0118501	6093	0.00612632	(Intercept)	-3.64635	1.00342	-3.63392	0.000279146
		0.0212501	10245	0.00949313	PGS	-0.150347	0.0888316	-1.6925	0.0905515	0.14648	0.860409	0.72292	1.02405
		0.3442	85143	0.00615198	SexM	-0.16807	0.181142	-0.927836	0.353493
		0.00285005	1633	0.0260467	StudyAIBL	-0.920635	0.203784	-4.51769	6.25182e-06
		5e-08	1	0.0110914	StudyOASIS	-0.324057	0.283082	-1.14475	0.252314
		0.0203001	9703	0.00618691	Age	0.0623258	0.0130511	4.77553	1.79238e-06
		0.0118501	6093	0.00933588	APOE_ε4_1	1.29256	0.215421	6.00015	1.97136e-09
		0.0212501	10245	0.00949313	APOE_ε4_2	3.33704	1.03105	3.23654	0.0012099
		0.3442	85143	0.00615198	PC1	-1.73042	6.72044	-0.257486	0.796804
		0.00285005	1633	0.0260467	PC2	-10.0717	6.80644	-1.47973	0.138946
		5e-08	1	0.0110914	PC3	-1.49149	7.25333	-0.205628	0.837081
	6	0.10035	35432	0.00881496	(Intercept)	-3.79765	0.970959	-3.91123	9.18254e-05
			6093	0.00933588	PGS	-0.178369	0.0884772	-2.01599	0.0438013	0.0830715	0.836634	0.703432	0.995059
			10245	0.00949313	SexM	-0.377597	0.182528	-2.06871	0.0385738
			85143	0.00615198	StudyAIBL	-1.01823	0.205382	-4.9577	7.13313e-07
			1633	0.0260467	StudyOASIS	-0.417432	0.284937	-1.465	0.142921
			1	0.0110914	Age	0.0680123	0.0127067	5.35248	8.67588e-08
			9703	0.00618691	APOE_ε4_1	1.14416	0.218739	5.23072	1.68855e-07
			6093	0.00933588	APOE_ε4_2	2.65372	0.740719	3.58263	0.000340148
			10245	0.00949313	PC1	2.73334	7.53158	0.362918	0.716666
			85143	0.00615198	PC2	0.0285012	6.73568	0.00423137	0.996624
			1633	0.0260467	PC3	-7.58935	9.75109	-0.778308	0.436387
	7	0.49765	106044	0.00465198	(Intercept)	-3.77933	1.00537	-3.75914	0.000170498
			9703	0.00618691	PGS	-0.131985	0.0895792	-1.47339	0.140645	0.211453	0.876354	0.735239	1.04455
			6093	0.00933588	SexM	-0.0710364	0.182013	-0.390282	0.696328
			10245	0.00949313	StudyAIBL	-1.01055	0.199955	-5.05389	4.32897e-07
			85143	0.00615198	StudyOASIS	-0.0127517	0.305334	-0.0417632	0.966687
			1633	0.0260467	Age	0.0651945	0.0131537	4.95637	7.18239e-07
			1	0.0110914	APOE_ε4_1	1.12308	0.210843	5.32661	1.00063e-07
			9703	0.00618691	APOE_ε4_2	2.51982	0.751904	3.35125	0.000804473
			6093	0.00933588	PC1	11.6195	7.83703	1.48263	0.138171
			10245	0.00949313	PC2	3.61018	7.04437	0.512492	0.608307
			85143	0.00615198	PC3	6.45982	7.51925	0.859103	0.390284
	8	0.00565005	3080	0.0246346	(Intercept)	-1.94969	0.98285	-1.98371	0.0472885
		5e-08	1	0.0110914	PGS	0.317502	0.0951208	3.33788	0.000844192	0.00206358	1.37369	1.14004	1.65523
		0.0203001	9703	0.00618691	SexM	-0.599654	0.187397	-3.19991	0.00137472
		0.0118501	6093	0.00933588	StudyAIBL	-1.42216	0.216267	-6.57596	4.83388e-11
		0.0212501	10245	0.00949313	StudyOASIS	-0.841168	0.288101	-2.9197	0.00350369
		0.3442	85143	0.00615198	Age	0.0484043	0.0128016	3.7811	0.000156136
		0.00285005	1633	0.0260467	APOE_ε4_1	1.05268	0.218567	4.81629	1.46251e-06
		5e-08	1	0.0110914	APOE_ε4_2	2.83586	0.745158	3.80571	0.000141396
		0.0203001	9703	0.00618691	PC1	-23.5428	6.68924	-3.51951	0.000432349
		0.0118501	6093	0.00933588	PC2	-11.8864	6.79782	-1.74856	0.080367
		0.0212501	10245	0.00949313	PC3	3.24109	6.66456	0.486318	0.626742
	9	5e-08	1	0.0110914	(Intercept)	-3.142	0.954828	-3.29065	0.000999565
		0.00285005	1633	0.0260467	PGS	-0.20971	0.0928047	-2.25969	0.0238402	0.0476805	0.810819	0.67597	0.97257
		5e-08	1	0.0110914	SexM	-0.0486672	0.184677	-0.263526	0.792145
		0.0203001	9703	0.00618691	StudyAIBL	-1.05532	0.209367	-5.04054	4.64217e-07
		0.0118501	6093	0.00933588	StudyOASIS	-0.402584	0.280172	-1.43692	0.150742
		0.0212501	10245	0.00949313	Age	0.0556726	0.0124156	4.48407	7.32323e-06
		0.3442	85143	0.00615198	APOE_ε4_1	1.57977	0.232699	6.7889	1.12991e-11
		0.00285005	1633	0.0260467	APOE_ε4_2	2.32623	0.627668	3.70614	0.000210439
		5e-08	1	0.0110914	PC1	-6.56348	7.18918	-0.912966	0.36126
		0.0203001	9703	0.00618691	PC2	-10.9957	6.30518	-1.74392	0.0811731
		0.0118501	6093	0.00933588	PC3	2.08549	6.83261	0.305226	0.760194
	10	0.0190501	9199	0.00517351	(Intercept)	-2.22264	0.94137	-2.36107	0.0182222
		0.3442	85143	0.00615198	PGS	-0.126661	0.0810751	-1.56226	0.118226	0.185783	0.881032	0.751587	1.03277
		0.00285005	1633	0.0260467	SexM	-0.0207496	0.177707	-0.116763	0.907048
		5e-08	1	0.0110914	StudyAIBL	-1.13574	0.204323	-5.55856	2.72005e-08
		0.0203001	9703	0.00618691	StudyOASIS	-0.501422	0.281653	-1.78028	0.0750296
		0.0118501	6093	0.00933588	Age	0.0439423	0.0120365	3.65075	0.000261478
		0.0212501	10245	0.00949313	APOE_ε4_1	1.23946	0.218644	5.66884	1.43765e-08
		0.3442	85143	0.00615198	APOE_ε4_2	2.60977	0.740888	3.52249	0.00042751
		0.00285005	1633	0.0260467	PC1	-5.65081	6.6289	-0.852451	0.393964
		5e-08	1	0.0110914	PC2	14.998	7.90385	1.89755	0.0577552
		0.0203001	9703	0.00618691	PC3	5.82831	6.85981	0.849631	0.39553
Overall summary
PGS	OR	OR 95% CI lower	OR 95% CI upper	P
Risk	1.207	1.14	1.278	7.77 x 10-11
Resilience	1.073	1.016	1.134	0.011
Accumulator	0.974	0.92	1.03	0.221

## Sheet: Table S6
Table S6. Full results of linear regression models testing risk, resilience and trait-specific PGSs against estimated Age at Onset of Aβ (AAO-Aβ) within each of 10 cross-validation (CV) runs. Also shown are overall mean β coefficients and 95% confidence intervals for each PGS. PGSs are standardised to mean = 0, SD = 1 within each sample. NSNPs = number of SNPs in optimal PGS
PGS	CV run	Threshold	NSNPs	PGS R2	Term	β	SE	t value	P	PFDR
Risk	1	0.0056	3325	0.0179615	(Intercept)	68.6987	0.983211	69.8718	1.77875e-217
				0.0329075	PGS	-1.12173	0.427747	-2.62241	0.0090859	0.0252386
				0.00415737	SexM	-0.228592	1.0224	-0.223583	0.823203
				0.0134928	StudyAIBL	1.81315	1.12021	1.61858	0.106376
				0.0270369	StudyOASIS	3.06434	1.83419	1.67068	0.0956177
				0.00713924	APOE_ε4_1	-6.36745	1.09007	-5.84132	1.12203e-08
				0.00458859	APOE_ε4_2	-11.0569	1.76725	-6.25657	1.07205e-09
				0.00941289	PC1	5.77859	47.5052	0.121641	0.903248
				0.024243	PC2	27.8089	46.8078	0.594109	0.552797
				0.0377753	PC3	6.70594	51.4426	0.130358	0.896353
	2	0.0056	3325	0.0329075	(Intercept)	70.6201	0.996291	70.883	1.17178e-219
				0.0329075	PGS	-1.91458	0.535262	-3.5769	0.000393101	0.00122844
				0.0329075	SexM	0.182219	0.999535	0.182304	0.855442
				0.0329075	StudyAIBL	2.73385	1.08538	2.5188	0.0121897
				0.0329075	StudyOASIS	-0.102152	1.86698	-0.0547149	0.956395
				0.0329075	APOE_ε4_1	-5.88198	1.05919	-5.55326	5.31036e-08
				0.0329075	APOE_ε4_2	-12.644	1.6781	-7.53472	3.68485e-13
				0.0329075	PC1	52.8333	49.5361	1.06656	0.286854
				0.0329075	PC2	-28.565	39.3896	-0.725193	0.468785
				0.0329075	PC3	42.0616	37.3372	1.12653	0.260659
	3	0.0056	3325	0.00415737	(Intercept)	71.1662	0.913331	77.9194	3.95908e-234
				0.00415737	PGS	-0.695154	0.554847	-1.25288	0.21103	0.376839
				0.00415737	SexM	0.415389	0.960068	0.432666	0.665506
				0.00415737	StudyAIBL	0.931523	1.10829	0.840506	0.401159
				0.00415737	StudyOASIS	1.81561	1.72874	1.05025	0.294279
				0.00415737	APOE_ε4_1	-7.41688	1.03379	-7.17446	3.89239e-12
				0.00415737	APOE_ε4_2	-14.4739	1.50706	-9.60409	1.12136e-19
				0.00415737	PC1	-5.92273	41.1514	-0.143925	0.885637
				0.00415737	PC2	9.94123	41.194	0.241327	0.809433
				0.00415737	PC3	10.4326	38.039	0.274261	0.784035
	4	0.0056	3325	0.0134928	(Intercept)	69.847	1.11319	62.7448	2.70514e-201
				0.0329075	PGS	-1.27192	0.560873	-2.26775	0.0239111	0.062924
				0.00415737	SexM	-0.307872	1.08037	-0.284968	0.775826
				0.0134928	StudyAIBL	0.056026	1.17095	0.0478468	0.961864
				0.0270369	StudyOASIS	1.47579	1.9815	0.744788	0.456865
				0.00713924	APOE_ε4_1	-5.34978	1.16428	-4.59495	5.91704e-06
				0.00458859	APOE_ε4_2	-12.9713	1.6615	-7.80698	5.87906e-14
				0.00941289	PC1	41.0735	45.6334	0.900075	0.368656
				0.024243	PC2	-3.44869	43.0865	-0.080041	0.936247
				0.0377753	PC3	81.6765	57.6767	1.41611	0.157571
	5	0.0056	3325	0.0270369	(Intercept)	72.0996	1.01513	71.025	5.81761e-220
				0.0329075	PGS	-1.50556	0.465773	-3.2324	0.00133595	0.00404833
				0.00415737	SexM	-1.37499	0.978004	-1.40592	0.160574
				0.0134928	StudyAIBL	-1.80815	1.09908	-1.64516	0.100773
				0.0270369	StudyOASIS	1.15363	1.6614	0.694372	0.487878
				0.00713924	APOE_ε4_1	-5.40147	1.04018	-5.19281	3.40038e-07
				0.00458859	APOE_ε4_2	-12.3459	1.5821	-7.80348	6.02122e-14
				0.00941289	PC1	15.6754	44.0348	0.355978	0.722057
				0.024243	PC2	11.9503	40.6069	0.294294	0.768696
				0.0377753	PC3	7.84218	62.8293	0.124817	0.900735
	6	0.0056	3325	0.00713924	(Intercept)	69.5968	1.03581	67.1906	1.46866e-211
				0.0329075	PGS	-0.88967	0.54107	-1.64428	0.100954	0.214796
				0.00415737	SexM	0.999373	1.02264	0.977244	0.329077
				0.0134928	StudyAIBL	1.79258	1.11781	1.60366	0.10963
				0.0270369	StudyOASIS	3.33309	1.70629	1.95342	0.0515114
				0.00713924	APOE_ε4_1	-6.81013	1.09893	-6.19706	1.51247e-09
				0.00458859	APOE_ε4_2	-12.4477	1.65314	-7.52971	3.80971e-13
				0.00941289	PC1	30.5951	47.4499	0.644789	0.519457
				0.024243	PC2	-37.9752	44.1477	-0.860185	0.390235
				0.0377753	PC3	72.4195	50.5984	1.43126	0.153186
	7	0.0056	3325	0.00458859	(Intercept)	69.3495	0.99506	69.6938	4.33352e-217
				0.0329075	PGS	-0.672788	0.511029	-1.31653	0.188796	0.343266
				0.00415737	SexM	0.275928	0.985896	0.279876	0.779727
				0.0134928	StudyAIBL	2.18337	1.09912	1.98646	0.0477079
				0.0270369	StudyOASIS	1.94005	1.59613	1.21547	0.22495
				0.00713924	APOE_ε4_1	-5.49922	1.07228	-5.12855	4.68523e-07
				0.00458859	APOE_ε4_2	-12.4862	1.54921	-8.05975	1.02773e-14
				0.00941289	PC1	6.41538	46.1954	0.138875	0.889624
				0.024243	PC2	15.6884	41.2548	0.38028	0.703953
				0.0377753	PC3	5.89014	38.1179	0.154524	0.87728
	8	0.0056	3325	0.00941289	(Intercept)	68.7124	1.14291	60.1205	5.99837e-195
				0.0329075	PGS	-1.18619	0.627548	-1.89021	0.0594993	0.141665
				0.00415737	SexM	-0.309951	1.04996	-0.295202	0.768002
				0.0134928	StudyAIBL	0.816893	1.15709	0.705988	0.480633
				0.0270369	StudyOASIS	2.49929	1.69511	1.47442	0.141206
				0.00713924	APOE_ε4_1	-4.95283	1.13616	-4.35928	1.68645e-05
				0.00458859	APOE_ε4_2	-11.4244	1.64931	-6.92678	1.87476e-11
				0.00941289	PC1	156.57	59.3577	2.63774	0.0086926
				0.024243	PC2	-17.1837	42.9612	-0.399982	0.689397
				0.0377753	PC3	20.4227	63.211	0.323087	0.746809
	9	0.0056	3325	0.024243	(Intercept)	70.0162	1.07807	64.9457	1.89192e-206
				0.0329075	PGS	-1.81977	0.595388	-3.05645	0.0023998	0.00705824
				0.00415737	SexM	-0.0209275	1.02646	-0.0203879	0.983745
				0.0134928	StudyAIBL	2.47706	1.09748	2.25706	0.024578
				0.0270369	StudyOASIS	2.36188	1.96702	1.20074	0.230609
				0.00713924	APOE_ε4_1	-6.53046	1.08122	-6.03992	3.7072e-09
				0.00458859	APOE_ε4_2	-14.7164	1.77136	-8.30794	1.78782e-15
				0.00941289	PC1	77.5885	45.1801	1.71732	0.0867447
				0.024243	PC2	31.0843	46.0153	0.675522	0.499759
				0.0377753	PC3	75.5709	52.4637	1.44044	0.150574
	10	0.0056	3325	0.0377753	(Intercept)	71.3407	1.02018	69.9293	1.33462e-217
				0.0329075	PGS	-2.20532	0.574001	-3.84202	0.0001432	0.000461937
				0.00415737	SexM	0.634127	1.01038	0.627615	0.530637
				0.0134928	StudyAIBL	0.614007	1.12539	0.545596	0.585667
				0.0270369	StudyOASIS	-0.543571	1.8011	-0.3018	0.762972
				0.00713924	APOE_ε4_1	-6.6825	1.06456	-6.27724	9.50728e-10
				0.00458859	APOE_ε4_2	-13.2314	1.72886	-7.65325	1.6665e-13
				0.00941289	PC1	86.6847	51.5161	1.68267	0.0932687
				0.024243	PC2	-28.1222	38.7158	-0.726375	0.468061
				0.0377753	PC3	36.2896	39.6965	0.914176	0.36121
Resilience	1	0.00175	34	0.000714719	(Intercept)	68.8095	0.998108	68.9399	1.92402e-215
					PGS	0.266704	0.514296	0.518581	0.604358	0.8167
					SexM	-0.134477	1.03084	-0.130454	0.896277
					StudyAIBL	1.85865	1.13073	1.64376	0.101061
					StudyOASIS	3.86963	1.83508	2.1087	0.0356316
					APOE_ε4_1	-6.4485	1.10022	-5.86109	1.0062e-08
					APOE_ε4_2	-11.3413	1.77949	-6.37334	5.41746e-10
					PC1	-28.2861	46.9206	-0.602851	0.546971
					PC2	27.133	47.329	0.573284	0.566795
					PC3	4.02608	51.8878	0.077592	0.938194
	2	0.00175	34	0.0225892	(Intercept)	70.5569	1.00123	70.4701	9.042e-219
					PGS	1.52452	0.517162	2.94785	0.00339961	0.0109665
					SexM	-0.0230803	1.00376	-0.0229938	0.981667
					StudyAIBL	2.30751	1.08672	2.12338	0.0343742
					StudyOASIS	0.876493	1.8738	0.467764	0.640225
					APOE_ε4_1	-5.96524	1.06433	-5.6047	4.04149e-08
					APOE_ε4_2	-12.5625	1.68693	-7.44696	6.59314e-13
					PC1	-11.3705	47.3507	-0.240133	0.810358
					PC2	-24.4302	39.6232	-0.616563	0.537896
					PC3	30.1918	37.4822	0.805499	0.421041
	3	0.00175	34	0.0119996	(Intercept)	70.8414	0.92304	76.7479	8.42088e-232
					PGS	1.03561	0.484615	2.13697	0.0332453	0.0874876
					SexM	0.530221	0.956481	0.554346	0.579671
					StudyAIBL	0.884876	1.10122	0.803541	0.42217
					StudyOASIS	2.44241	1.70337	1.43387	0.15244
					APOE_ε4_1	-7.40308	1.02969	-7.18964	3.53023e-12
					APOE_ε4_2	-14.5463	1.50166	-9.6868	5.87648e-20
					PC1	-26.5573	40.0272	-0.663481	0.507429
					PC2	12.4153	41.0429	0.302497	0.762441
					PC3	17.3072	38.0505	0.454849	0.649481
	4	0.00175	34	0.00287026	(Intercept)	69.9392	1.11824	62.5438	8.13847e-201
					PGS	0.57003	0.547923	1.04035	0.298847	0.524293
					SexM	-0.237243	1.08846	-0.217962	0.827577
					StudyAIBL	0.079738	1.17894	0.0676354	0.946112
					StudyOASIS	2.30376	1.9675	1.17091	0.242377
					APOE_ε4_1	-5.7437	1.16309	-4.9383	1.18754e-06
					APOE_ε4_2	-13.1084	1.67568	-7.8227	5.28055e-14
					PC1	8.80036	44.2051	0.19908	0.842307
					PC2	3.59849	43.2193	0.0832613	0.933688
					PC3	80.752	58.0306	1.39154	0.164884
	5	0.00175	34	0.0126385	(Intercept)	71.4068	1.03021	69.3126	2.93759e-216
					PGS	1.23711	0.563904	2.19383	0.0288591	0.0801642
					SexM	-1.11769	0.989209	-1.12988	0.259245
					StudyAIBL	-1.45813	1.1073	-1.31684	0.188694
					StudyOASIS	2.10401	1.66159	1.26627	0.206201
					APOE_ε4_1	-5.5204	1.04722	-5.27147	2.28685e-07
					APOE_ε4_2	-12.5952	1.59293	-7.90695	2.96286e-14
					PC1	-24.0741	43.1336	-0.558128	0.577089
					PC2	11.9859	40.9131	0.29296	0.769715
					PC3	4.96984	63.2823	0.0785345	0.937445
	6	0.00175	34	0.0210424	(Intercept)	69.3892	1.03087	67.3111	7.88229e-212
					PGS	1.40135	0.492931	2.84289	0.00471469	0.0147334
					SexM	1.07827	1.01225	1.06522	0.287458
					StudyAIBL	2.18703	1.11986	1.95295	0.0515667
					StudyOASIS	4.0947	1.69636	2.41381	0.0162636
					APOE_ε4_1	-6.94026	1.09003	-6.36706	5.62118e-10
					APOE_ε4_2	-12.3866	1.64063	-7.54993	3.32968e-13
					PC1	12.275	46.4293	0.26438	0.791632
					PC2	-40.5734	43.8505	-0.925266	0.355421
					PC3	64.3261	50.3648	1.2772	0.202319
	7	0.00175	34	0.00196436	(Intercept)	69.6078	1.00646	69.1608	6.30924e-216
					PGS	0.452749	0.526291	0.860264	0.390192	0.65032
					SexM	0.24288	0.987451	0.245967	0.805842
					StudyAIBL	2.01487	1.10396	1.82512	0.0687757
					StudyOASIS	2.0593	1.59758	1.28902	0.198185
					APOE_ε4_1	-5.76523	1.06466	-5.4151	1.09473e-07
					APOE_ε4_2	-12.6301	1.54746	-8.16181	5.0281e-15
					PC1	-11.9056	44.7245	-0.266197	0.790233
					PC2	14.0322	41.3352	0.339473	0.734443
					PC3	4.97255	38.1594	0.13031	0.896391
	8	0.00175	34	0.00226708	(Intercept)	68.8664	1.1432	60.2401	3.04876e-195
					PGS	0.483918	0.523542	0.924316	0.355915	0.603245
					SexM	-0.300744	1.05387	-0.285372	0.775516
					StudyAIBL	0.749433	1.16105	0.645477	0.519012
					StudyOASIS	2.74299	1.70751	1.60643	0.109018
					APOE_ε4_1	-5.16961	1.13742	-4.54503	7.41451e-06
					APOE_ε4_2	-11.7582	1.64952	-7.12824	5.23508e-12
					PC1	124.529	57.6743	2.15917	0.0314686
					PC2	-13.3541	43.0718	-0.310043	0.7567
					PC3	23.7175	63.411	0.374029	0.708593
	9	0.00175	34	0.00731505	(Intercept)	69.9949	1.09004	64.2132	9.46992e-205
					PGS	0.99359	0.596912	1.66455	0.0968356	0.220081
					SexM	-0.0451863	1.03529	-0.0436462	0.96521
					StudyAIBL	2.46444	1.10701	2.22621	0.026592
					StudyOASIS	3.50604	1.96402	1.78514	0.075045
					APOE_ε4_1	-6.8859	1.08317	-6.35718	5.9573e-10
					APOE_ε4_2	-15.0092	1.78333	-8.4164	8.23403e-16
					PC1	32.6796	43.6371	0.748896	0.454388
					PC2	21.6633	46.4751	0.466128	0.641394
					PC3	72.7142	52.9098	1.3743	0.170166
	10	0.00175	34	0.0164859	(Intercept)	71.4601	1.03947	68.7465	5.12173e-215
					PGS	1.20942	0.481746	2.5105	0.012475	0.0378031
					SexM	0.511256	1.02476	0.498902	0.61814
					StudyAIBL	0.31614	1.13771	0.277874	0.781262
					StudyOASIS	0.381785	1.80894	0.211055	0.832959
					APOE_ε4_1	-7.06096	1.07446	-6.57164	1.66289e-10
					APOE_ε4_2	-13.3137	1.74908	-7.61185	2.20092e-13
					PC1	40.6828	50.6619	0.803026	0.422467
					PC2	-25.469	39.1635	-0.650325	0.515879
					PC3	31.1139	40.1421	0.775095	0.438771
AAO-Aβ	1	0.00185005	1246	0.00717796	(Intercept)	68.7723	0.988483	69.5736	7.91431e-217
		0.00015005	133	0.0101777	PGS	0.749413	0.45453	1.64876	0.100031	0.217459
		0.00015005	133	0.0101777	SexM	-0.147958	1.0273	-0.144025	0.885558
		0.00015005	133	0.0101777	StudyAIBL	1.71047	1.12892	1.51514	0.130578
		0.00015005	133	0.0101777	StudyOASIS	3.71502	1.82361	2.03717	0.0423324
		0.00015005	133	0.0101777	APOE_ε4_1	-6.36315	1.09647	-5.80329	1.38253e-08
		0.00015005	133	0.0101777	APOE_ε4_2	-11.123	1.77841	-6.2545	1.08503e-09
		0.00015005	133	0.0101777	PC1	-21.4632	46.3449	-0.46312	0.643546
		0.00015005	133	0.0101777	PC2	27.5356	47.069	0.585006	0.558895
		0.00015005	133	0.0101777	PC3	4.00942	51.7105	0.0775358	0.938239
	2	0.00045005	321	0.0160986	(Intercept)	70.2905	1.00169	70.1718	3.98152e-218
		0.47995	103436	0.011828	PGS	-1.46237	0.589585	-2.48034	0.0135626	0.0410986
		0.47995	103436	0.011828	SexM	-0.311577	1.01537	-0.306862	0.759118
		0.47995	103436	0.011828	StudyAIBL	2.55885	1.0926	2.34198	0.019703
		0.47995	103436	0.011828	StudyOASIS	0.592368	1.87595	0.315769	0.752353
		0.47995	103436	0.011828	APOE_ε4_1	-6.03542	1.06779	-5.65224	3.1346e-08
		0.47995	103436	0.011828	APOE_ε4_2	-12.477	1.69301	-7.36967	1.09622e-12
		0.47995	103436	0.011828	PC1	-10.8256	47.5271	-0.227778	0.819943
		0.47995	103436	0.011828	PC2	-23.9665	39.7724	-0.60259	0.547145
		0.47995	103436	0.011828	PC3	38.9294	37.6453	1.03411	0.30175
	3	0.00120005	871	0.00779075	(Intercept)	71.0126	0.916553	77.4779	2.95929e-233
		5.005e-05	33	0.0040363	PGS	0.916024	0.53312	1.71823	0.0865774	0.201343
		5.005e-05	33	0.0040363	SexM	0.564377	0.960015	0.587883	0.556963
		5.005e-05	33	0.0040363	StudyAIBL	0.821332	1.10326	0.744457	0.457065
		5.005e-05	33	0.0040363	StudyOASIS	2.29025	1.70365	1.34432	0.179656
		5.005e-05	33	0.0040363	APOE_ε4_1	-7.3433	1.03256	-7.11177	5.81647e-12
		5.005e-05	33	0.0040363	APOE_ε4_2	-14.37	1.50396	-9.55476	1.64612e-19
		5.005e-05	33	0.0040363	PC1	-13.3672	40.0102	-0.334095	0.738494
		5.005e-05	33	0.0040363	PC2	14.0068	41.1754	0.340174	0.733915
		5.005e-05	33	0.0040363	PC3	9.33423	37.9661	0.245857	0.805927
	4	0.00080005	625	0.0144644	(Intercept)	69.6151	1.12164	62.0654	1.13188e-199
		0.25705	70303	0.00547814	PGS	-1.25326	0.533499	-2.34914	0.0193338	0.0562943
		0.25705	70303	0.00547814	SexM	-0.338108	1.0799	-0.313091	0.754385
		0.25705	70303	0.00547814	StudyAIBL	-0.210226	1.17396	-0.179074	0.857976
		0.25705	70303	0.00547814	StudyOASIS	2.34154	1.95476	1.19787	0.231723
		0.25705	70303	0.00547814	APOE_ε4_1	-5.38545	1.16137	-4.63718	4.88124e-06
		0.25705	70303	0.00547814	APOE_ε4_2	-12.7813	1.66263	-7.68743	1.32359e-13
		0.25705	70303	0.00547814	PC1	8.09859	43.8543	0.18467	0.853587
		0.25705	70303	0.00547814	PC2	0.12883	42.9854	0.00299706	0.99761
		0.25705	70303	0.00547814	PC3	71.3646	57.8645	1.23331	0.218232
	5	0.0239001	11333	0.00719745	(Intercept)	71.8015	1.02031	70.3725	1.4675e-218
		0.0583501	23173	0.00895819	PGS	-0.737961	0.446973	-1.65102	0.0995698	0.217459
		0.0583501	23173	0.00895819	SexM	-1.38787	0.988699	-1.40373	0.161224
		0.0583501	23173	0.00895819	StudyAIBL	-1.60761	1.10837	-1.45042	0.147776
		0.0583501	23173	0.00895819	StudyOASIS	1.82206	1.66328	1.09547	0.274014
		0.0583501	23173	0.00895819	APOE_ε4_1	-5.6493	1.0531	-5.36443	1.42219e-07
		0.0583501	23173	0.00895819	APOE_ε4_2	-12.61	1.59773	-7.89243	3.27409e-14
		0.0583501	23173	0.00895819	PC1	-21.3774	43.2124	-0.494705	0.621097
		0.0583501	23173	0.00895819	PC2	11.7261	41.0413	0.285715	0.775254
		0.0583501	23173	0.00895819	PC3	-2.97184	63.4786	-0.0468165	0.962684
	6	0.00025005	201	0.0250523	(Intercept)	69.1182	1.03744	66.6239	2.77409e-210
		0.00205005	1445	0.015125	PGS	-1.48065	0.476349	-3.10833	0.0020247	0.00653129
		0.00205005	1445	0.015125	SexM	0.997732	1.01096	0.986916	0.324318
		0.00205005	1445	0.015125	StudyAIBL	2.29556	1.12078	2.04817	0.0412369
		0.00205005	1445	0.015125	StudyOASIS	3.57922	1.68364	2.12588	0.0341645
		0.00205005	1445	0.015125	APOE_ε4_1	-7.0941	1.08952	-6.51121	2.39018e-10
		0.00205005	1445	0.015125	APOE_ε4_2	-12.5583	1.63558	-7.67822	1.40848e-13
		0.00205005	1445	0.015125	PC1	26.2799	46.3995	0.566385	0.57147
		0.00205005	1445	0.015125	PC2	-43.0548	43.7844	-0.983336	0.326074
		0.00205005	1445	0.015125	PC3	71.436	50.1044	1.42574	0.154772
	7	0.00040005	290	0.00764495	(Intercept)	69.4107	0.990209	70.097	5.78081e-218
		0.00395005	2500	0.0204225	PGS	0.788657	0.463383	1.70195	0.0895907	0.203615
		0.00395005	2500	0.0204225	SexM	0.21575	0.984743	0.219093	0.826696
		0.00395005	2500	0.0204225	StudyAIBL	2.29638	1.10158	2.08463	0.0377775
		0.00395005	2500	0.0204225	StudyOASIS	2.11227	1.59333	1.3257	0.185744
		0.00395005	2500	0.0204225	APOE_ε4_1	-5.71046	1.05928	-5.39091	1.24074e-07
		0.00395005	2500	0.0204225	APOE_ε4_2	-12.8	1.54633	-8.2777	2.21668e-15
		0.00395005	2500	0.0204225	PC1	-10.915	44.5192	-0.245175	0.806455
		0.00395005	2500	0.0204225	PC2	17.5757	41.2119	0.426472	0.670008
		0.00395005	2500	0.0204225	PC3	7.22726	38.0796	0.189793	0.849573
	8	0.00015005	130	0.00643066	(Intercept)	69.1435	1.14994	60.128	5.74867e-195
		0.00285005	1907	0.0206071	PGS	0.811362	0.520106	1.55999	0.119603	0.249172
		0.00285005	1907	0.0206071	SexM	-0.470179	1.05617	-0.445175	0.656449
		0.00285005	1907	0.0206071	StudyAIBL	0.650201	1.15721	0.561871	0.574539
		0.00285005	1907	0.0206071	StudyOASIS	2.77833	1.70072	1.63362	0.103176
		0.00285005	1907	0.0206071	APOE_ε4_1	-5.04614	1.1353	-4.44476	1.15947e-05
		0.00285005	1907	0.0206071	APOE_ε4_2	-11.6224	1.64593	-7.06129	8.02281e-12
		0.00285005	1907	0.0206071	PC1	124.696	57.4828	2.16928	0.0306873
		0.00285005	1907	0.0206071	PC2	-6.58315	42.9761	-0.153182	0.878337
		0.00285005	1907	0.0206071	PC3	29.1235	63.3631	0.459628	0.646049
	9	0.0545501	22132	0.00223782	(Intercept)	70.0229	1.09662	63.8535	6.55968e-204
		0.01515	7820	0.0118173	PGS	0.441738	0.481029	0.918318	0.359041	0.569906
		0.01515	7820	0.0118173	SexM	-0.0511083	1.03792	-0.049241	0.960753
		0.01515	7820	0.0118173	StudyAIBL	2.59297	1.11618	2.32308	0.0207076
		0.01515	7820	0.0118173	StudyOASIS	3.38322	1.96727	1.71976	0.0862994
		0.01515	7820	0.0118173	APOE_ε4_1	-7.01609	1.09086	-6.43171	3.83739e-10
		0.01515	7820	0.0118173	APOE_ε4_2	-15.0442	1.78771	-8.41534	8.29652e-16
		0.01515	7820	0.0118173	PC1	37.0565	43.6704	0.84855	0.396672
		0.01515	7820	0.0118173	PC2	23.5751	46.6087	0.505808	0.613288
		0.01515	7820	0.0118173	PC3	70.9381	53.0895	1.3362	0.182293
	10	0.00100005	692	0.0170454	(Intercept)	71.238	1.03059	69.1233	7.62434e-216
		0.00140005	978	0.00828751	PGS	1.34457	0.526566	2.55347	0.0110595	0.034561
		0.00140005	978	0.00828751	SexM	0.743256	1.02095	0.728007	0.467062
		0.00140005	978	0.00828751	StudyAIBL	0.204014	1.13996	0.178966	0.858061
		0.00140005	978	0.00828751	StudyOASIS	0.300319	1.8079	0.166115	0.868156
		0.00140005	978	0.00828751	APOE_ε4_1	-7.29298	1.08121	-6.74521	5.78387e-11
		0.00140005	978	0.00828751	APOE_ε4_2	-13.5584	1.74463	-7.77151	7.48621e-14
		0.00140005	978	0.00828751	PC1	25.589	50.9951	0.501793	0.616107
		0.00140005	978	0.00828751	PC2	-31.4282	39.144	-0.802887	0.422547
		0.00140005	978	0.00828751	PC3	39.3791	40.1761	0.980161	0.327637
Overall summary
PGS	β	95% CI lower	95% CI upper	P
Risk	-1.328	-1.494	-1.162	9.55 x 10-15
Resilience	0.918	0.778	1.057	2.16 x 10-8
AAO-Aβ	0.012	-0.34	0.363	0.815
